# Supplementary material for: Fibrous porous silica microspheres decorated with Mn3O4 for effective removal of methyl orange from aqueous solution
Source: Royal Society of Chemistry journal article supplement (doi:10.1039/c5ra21783k), 2015-01-01
Supplement: c5ra21783k1.pdf [file c5ra21783k1.pdf]

**Supporting Information**

**Fibrous porous silica microspheres decorated with Mn<sub>3</sub>O<sub>4</sub> for effective removal  
of methyl orange from aqueous solution**

Yaxi Tian, Yan Liu, Zebin Sun, Haizhen Li, Guijia Cui, Shiqiang Yan\*

*College of Chemistry and Chemical Engineering, Lanzhou University, Lanzhou 730000, P. R.*

*China*

---

\* Corresponding author. Tel.: +86 931 8912582; Fax: +86 931 8912582

E-mail address: yansq@lzu.edu.cn

**1.Fig. S1** Surface characteristic of different materials.

| Samples                 | Surface area<br>( $\text{m}^2 \text{g}^{-1}$ ) | Pore volume<br>( $\text{cm}^3 \text{g}^{-1}$ ) | Pore size<br>(nm) |
|-------------------------|------------------------------------------------|------------------------------------------------|-------------------|
| $\text{Mn}_3\text{O}_4$ | 33.494                                         | 0.17                                           | 20.47             |
| KCC-1                   | 333.69                                         | 0.71                                           | 8.42              |
| $\text{M}_1$            | 312.32                                         | 0.74                                           | 9.48              |
| $\text{M}_2$            | 310.44                                         | 0.57                                           | 7.29              |
| $\text{M}_3$            | 223.49                                         | 0.55                                           | 9.81              |

**2.Adsorption kinetics.**

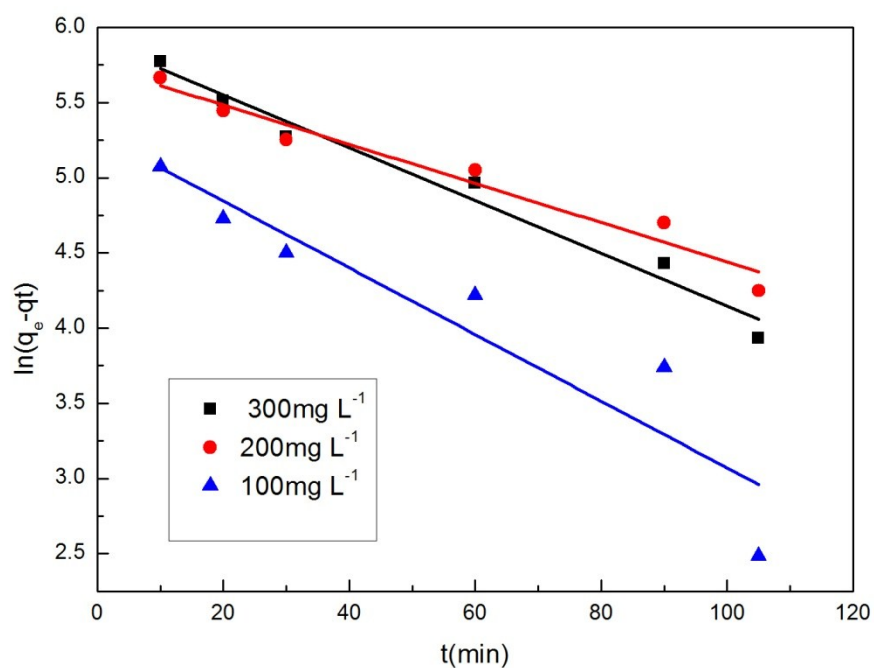

**Fig. S2** Plot of the pseudo-first-order kinetic model for MO on  $\text{Mn}_3\text{O}_4/\text{KCC-1}$ .

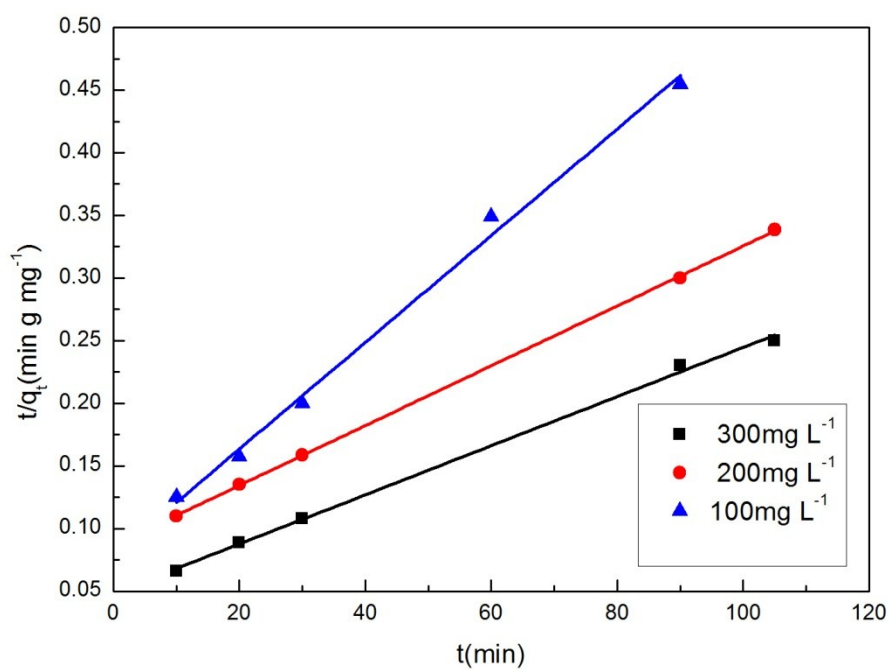

**Fig. S3** Plot of the pseudo-second-order kinetic model for MO on Mn<sub>3</sub>O<sub>4</sub>/KCC-1.

### 3. Adsorption isotherms.

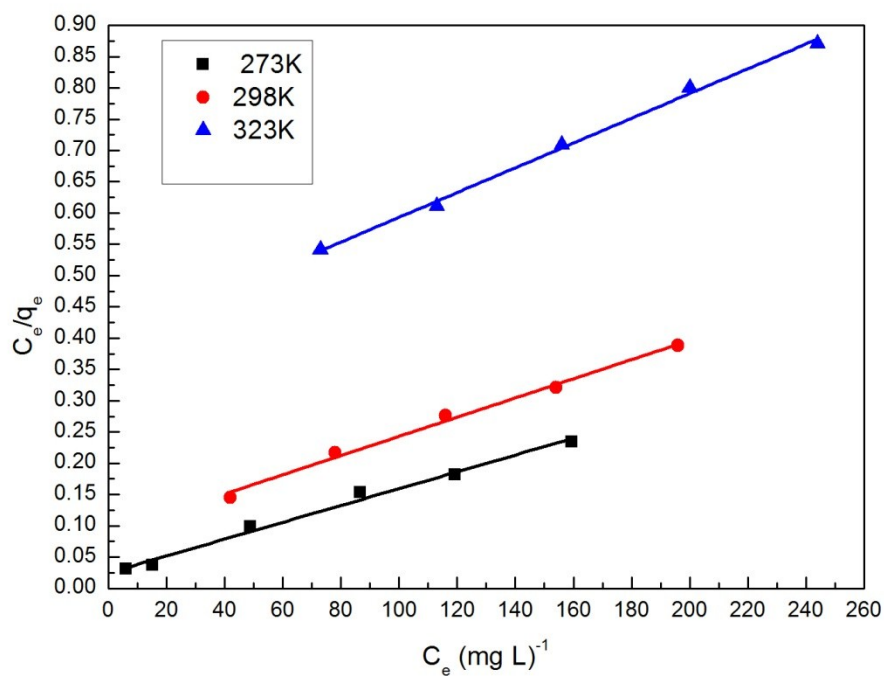

**Fig. S4** Langmuir isotherms for MO adsorption onto Mn<sub>3</sub>O<sub>4</sub>/KCC-1 at different temperatures.

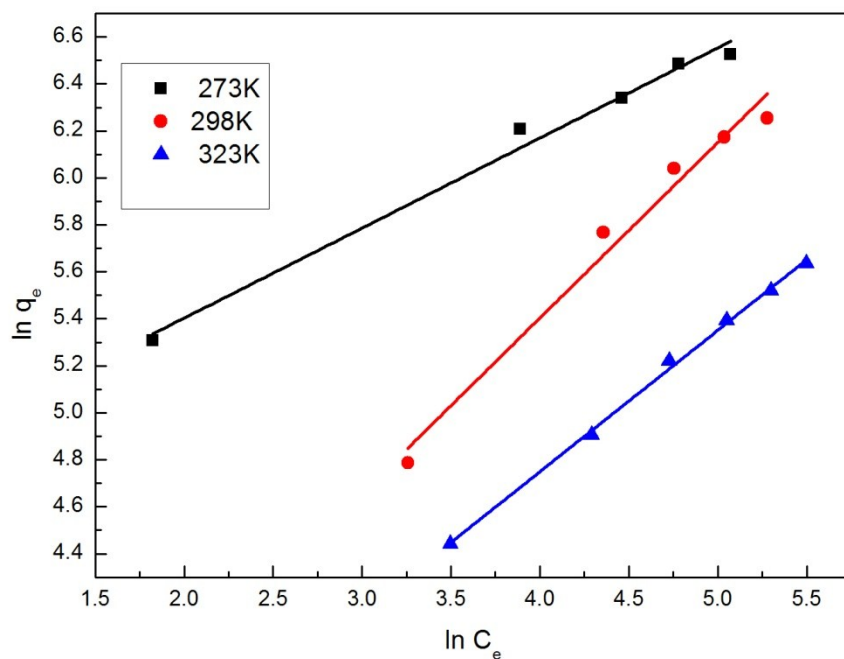

**Fig. S5** Freundlich isotherms for MO adsorption onto Mn<sub>3</sub>O<sub>4</sub>/KCC-1 at different temperatures.

#### 4. Thermodynamic studies.

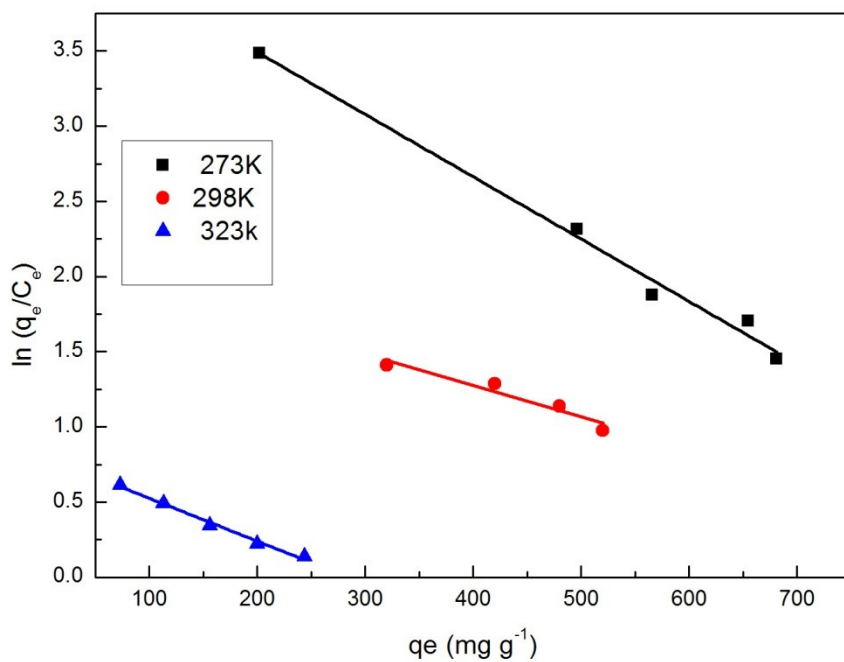

**Fig. S6** Plots of  $\ln q_e/C_e$  vs  $q_e$  for calculation of thermodynamic parameters.

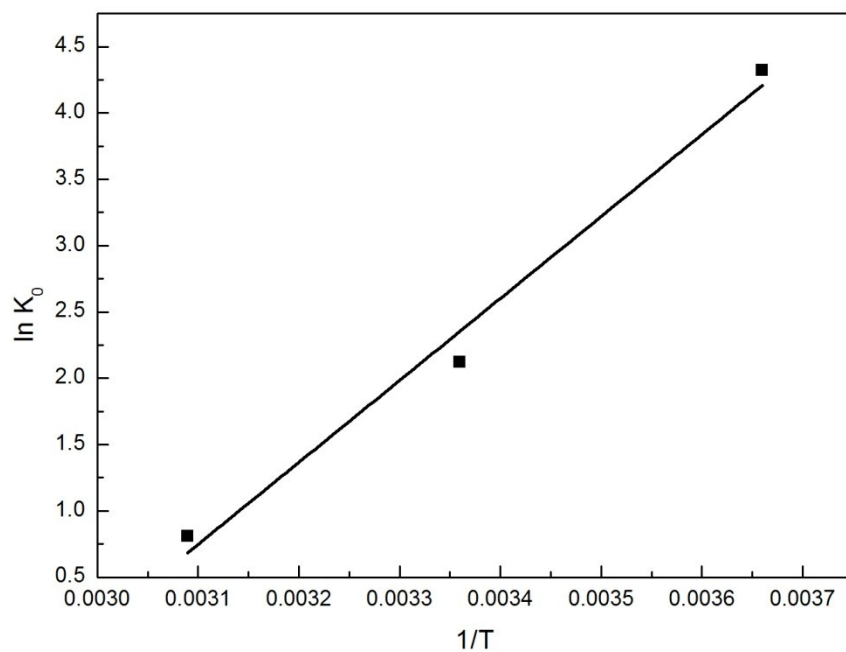

**Fig. S7** Van't Hoff plot for the adsorption of MO onto Mn<sub>3</sub>O<sub>4</sub>/KCC-1.

### 5. Adsorption spectra.

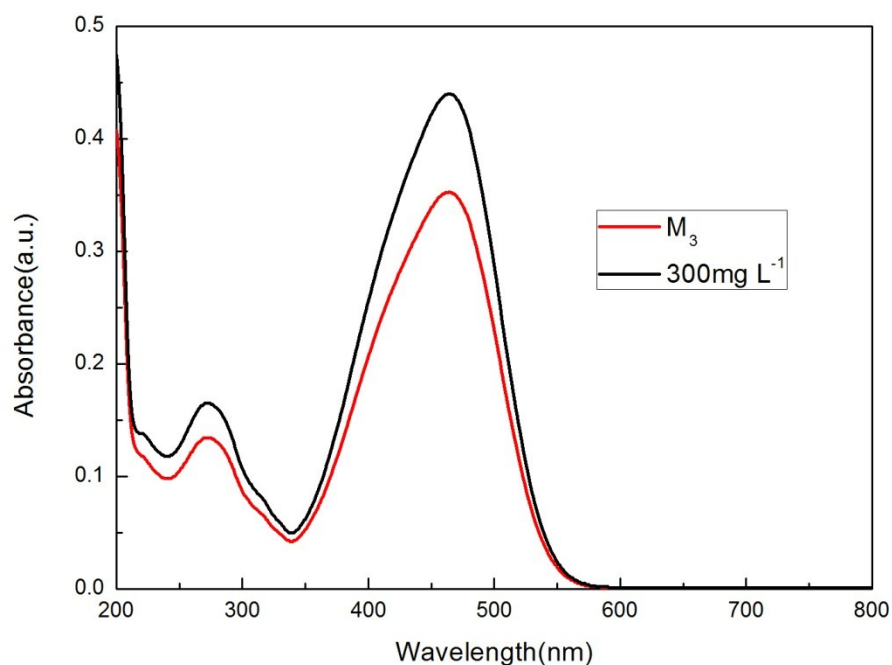

**Fig. S8** The absorption spectra of methyl orange in the presence of M<sub>3</sub>. All the samples of MO solution was diluted before measurement.
